# Supplementary material
Source: PubMed Central journal article supplement (PMC547877)
Supplement: pnas_102_5_1584__6.pdf [file pnas_102_5_1584__6.pdf]

**Table 3. Cell number of viable cells on day 3 of LPS/IL4 cultures in the context of the frequency of switched cells**

| <b>Experiment</b> | <b>Genotype</b>               | <b>Ratio of tat-Cre-treated versus nontreated viable cells</b> | <b>Ratio of tat-Cre-treated versus nontreated IgG1<sup>+</sup> cells</b> |
|-------------------|-------------------------------|----------------------------------------------------------------|--------------------------------------------------------------------------|
| 1                 | <i>Nbn<sup>lox-6/Δ6</sup></i> | 1.38                                                           | 0.34                                                                     |
| 2                 |                               | 1.44                                                           | 0.7                                                                      |
| 3                 |                               | 0.68                                                           | 0.65                                                                     |
| 1                 | <i>Nbn<sup>lox-6/WT</sup></i> | 0.47                                                           | 0.93                                                                     |
| 2                 |                               | 0.83                                                           | 1.04                                                                     |
| 3                 |                               | 1.15                                                           | 0.75                                                                     |

| <b>Experiment</b> | <b>Ratio of CD19-Cre/<i>Nbn<sup>lox-6/lox-6</sup></i> versus CD19-Cre/<i>Nbn<sup>lox-6/WT</sup></i> viable cells</b> | <b>Ratio of CD19-Cre/<i>Nbn<sup>lox-6/lox-6</sup></i> versus CD19-Cre/<i>Nbn<sup>lox-6/WT</sup></i> IgG1<sup>+</sup> cells</b> |
|-------------------|----------------------------------------------------------------------------------------------------------------------|--------------------------------------------------------------------------------------------------------------------------------|
| 1                 | 2.64                                                                                                                 | 0.16                                                                                                                           |
| 2                 | 0.39                                                                                                                 | 0.48                                                                                                                           |
| 3                 | 0.53                                                                                                                 | 0.45                                                                                                                           |
| 4                 | 0.86                                                                                                                 | 0.40                                                                                                                           |
