# Supplementary material
Source: PubMed Central journal article supplement (PMC547877)

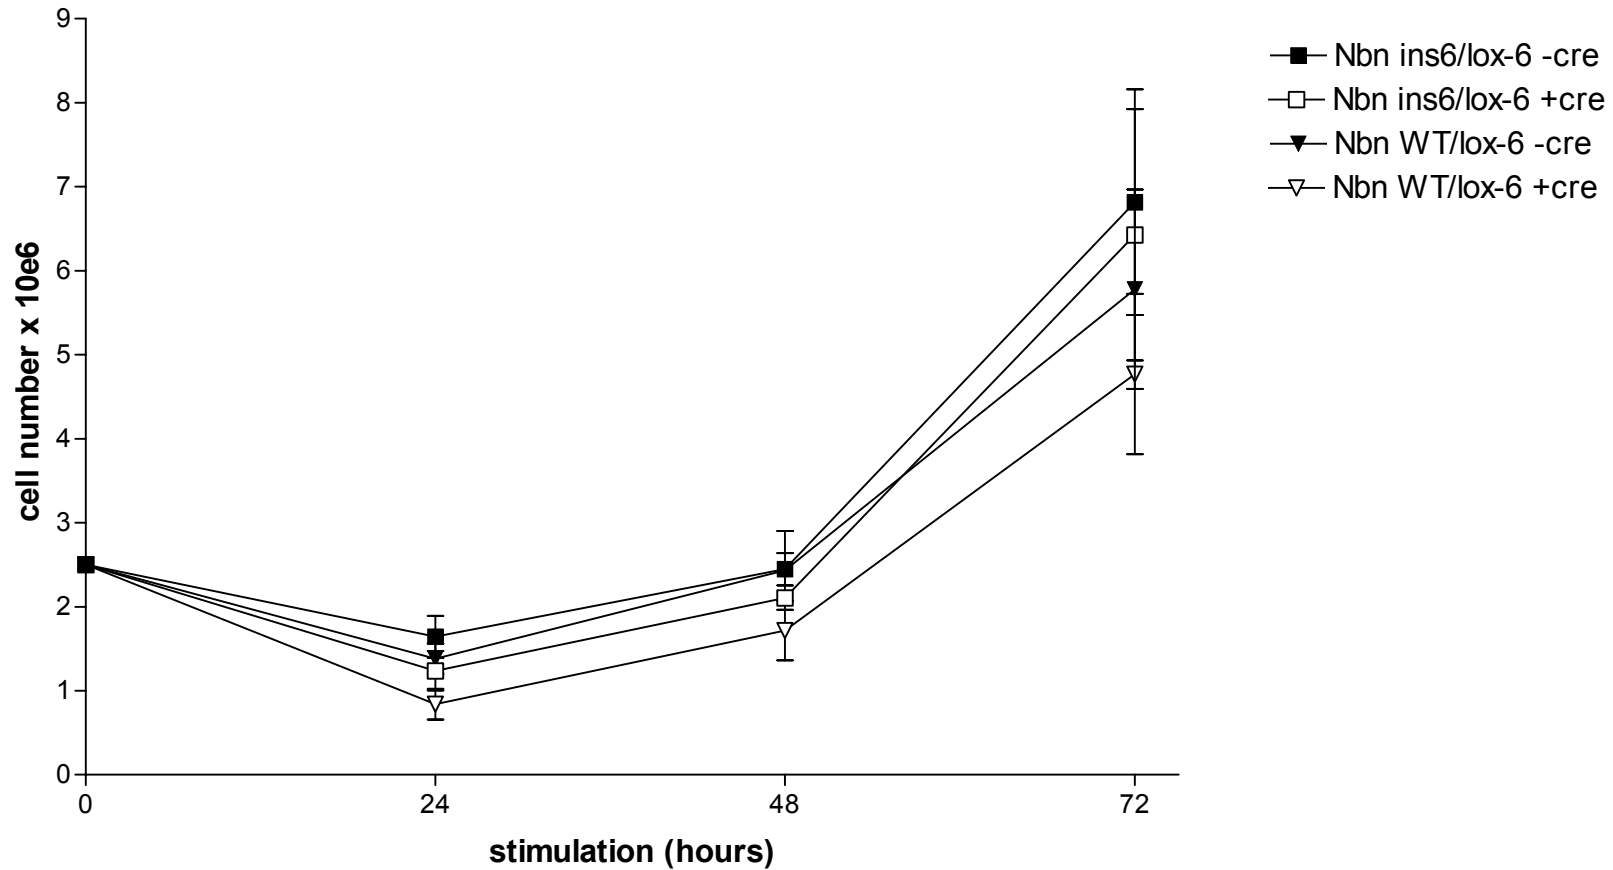

Supplement: pnas_102_5_1584__1.pdf [file pnas_102_5_1584__1.pdf]
